# Supplementary material for: Mothers’ experience of maternity and neonatal care when babies die: A quantitative study
Source: PubMed Central journal article supplement (PMC6281265; doi:10.1371/journal.pone.0208134), 2018-12-05

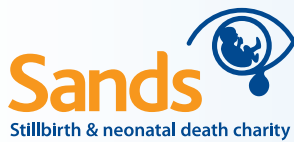

Sands helpline:  
**020 7436 5881**

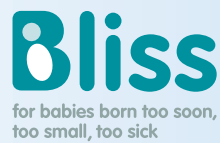

Bliss helpline:  
**0500 618 140**

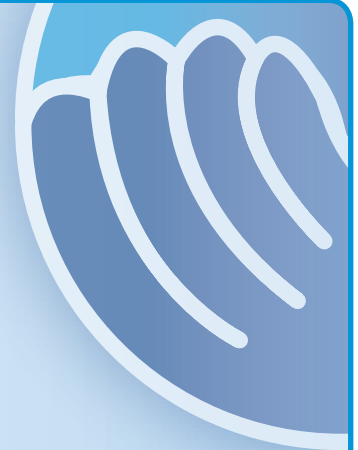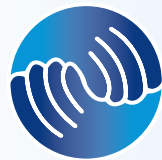

## Listening to Parents

### The experiences of women and partners after the death of their baby

We are carrying out this independent survey with the aim of improving care for women who have a baby who dies in the early days or weeks after birth. We feel it is really important to hear the views of women like you who are often not consulted in this way.

We would like to be able to feed back your views about your recent experience to health care providers and the Department of Health who have funded the research. In this way you can help to improve maternity services for women and families who experience such a loss.

The national parent support groups Sands and Bliss are supporting us in this work.

We asked the Office for National Statistics (ONS) to send out this survey on our behalf. They have **not** told us your name and we do **not** have access to any of your details.

If you would prefer not to fill in this questionnaire, please just return it in the pre-paid envelope. This will ensure that we don't contact you again.

If the survey raises issues, emotions or questions of concern, you may wish to contact your family doctor (GP) or Health Visitor or the helplines at Sands or Bliss (see telephone numbers above).

If you would like to talk to someone about this survey, complete the questionnaire over the telephone or with the help of an interpreter, please call us on (Freephone) 0808 252 4566 or email us [listeningtoparents@npeu.ox.ac.uk](mailto:listeningtoparents@npeu.ox.ac.uk)

Maggie Redshaw and Rachel Rowe  
National Perinatal Epidemiology Unit  
University of Oxford  
Old Road Campus  
Headington  
Oxford OX3 7LF

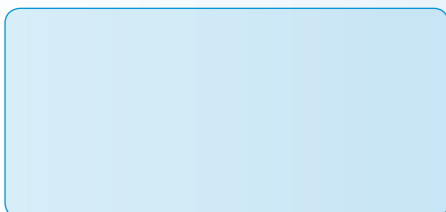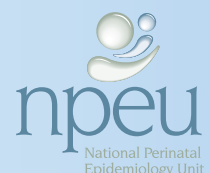

## How to complete this questionnaire

- If you have been pregnant before or have experienced the death of a baby before, please only think about the care you received in your recent pregnancy when your baby died when answering these questions.
- For most questions, please tick clearly inside one box  or write clearly on the line or in the box provided. For some questions you may tick more than one box. A small number of questions give you the chance to tell us more about your care and there is a large space at the end where you can tell us anything else that you would like to say about your care.
- The questionnaire is in sections and covers many different aspects of your care during your pregnancy, when your baby died and afterwards. You may not have to complete it all, but you will be guided to the right sections for you. The different sections cover the following topics:
  - Section A: Your baby
  - Section B: Antenatal care
  - Section C: The birth of your baby
  - Section D: If your baby needed specialist care
  - Section E: Your care in hospital after the birth
  - Section F: Your care at home after the birth
  - Section G: Care when your baby died
  - Section H: Father and partner experience
  - Section J: You and your partner's health and wellbeing
  - Section K: Previous and future pregnancies
  - Section L: You and your household
- You may like to take a break while filling in the questionnaire. You may also like to refer to your pregnancy notes, if you still have a copy, for some questions.
- If you have any questions about completing this questionnaire please call us on 0808 252 4566 or email [listeningtoparents@npeu.ox.ac.uk](mailto:listeningtoparents@npeu.ox.ac.uk)

Please tell us the date you filled in the questionnaire

|     |   |   |       |   |   |      |   |
|-----|---|---|-------|---|---|------|---|
| D   | D | / | M     | M | / | Y    | Y |
| Day |   |   | Month |   |   | Year |   |

## Section A: Your baby

A1. Was your baby who died...?  <sub>1</sub> A single baby  <sub>2</sub> A twin  <sub>3</sub> A triplet or more

A2. When was your baby born? 

|     |   |   |       |   |   |      |   |   |      |   |   |   |   |
|-----|---|---|-------|---|---|------|---|---|------|---|---|---|---|
| D   | D | / | M     | M | / | Y    | Y | : | h    | h | : | m | m |
| Day |   |   | Month |   |   | Year |   |   | 24hr |   |   |   |   |

A3. Roughly how many weeks pregnant were you when your baby was born?   weeks

If you were pregnant with twins, triplets or more and more than one baby died, we may have sent you more than one questionnaire.

If you wish to complete one questionnaire in full for each baby, please do so. Otherwise, please complete one questionnaire in full for your baby who died first, then for your other baby/babies who died please use the other questionnaire(s) and just complete those questions or sections for which your answers are different.

If we have not sent you enough copies of the questionnaire, please contact us.

From here, the questions cover your 'story', from pregnancy to the death of your baby and beyond. In several sections, and at the end, there are boxes for you to say more, in your own words. Please tell us as much or as little as you like.

## Section B: Antenatal care

### Your early care in pregnancy

B1. Roughly how many weeks pregnant were you when you first realised you might be pregnant?   weeks

B2. Was this pregnancy the result of infertility treatment?  <sub>1</sub> Yes  <sub>2</sub> No

B3. Which health professional did you go to first about your pregnancy care?  
*Please tick one box only*  <sub>1</sub> Family doctor (GP)  <sub>2</sub> Midwife  <sub>3</sub> Other

B4. Roughly how many weeks pregnant were you when you first saw this health professional about your pregnancy care?   weeks

B5. Roughly how many weeks pregnant were you when you had your 'booking' appointment?  
The appointment where you were given your hand held pregnancy records/notes   weeks

B6. Were any problems identified with you or your baby at or before your antenatal booking?  <sub>1</sub> Yes  <sub>2</sub> No

If any problems were identified, what were these?

**B7. Before you became pregnant did you have any of the following long-term health problems?**

Please tick all that apply

|                           | Yes, I experienced this    | Yes, I saw a doctor or midwife about this |
|---------------------------|----------------------------|-------------------------------------------|
| Diabetes                  | <input type="checkbox"/> 1 | <input type="checkbox"/> 2                |
| Anaemia                   | <input type="checkbox"/> 1 | <input type="checkbox"/> 2                |
| Epilepsy                  | <input type="checkbox"/> 1 | <input type="checkbox"/> 2                |
| High blood pressure       | <input type="checkbox"/> 1 | <input type="checkbox"/> 2                |
| Obesity                   | <input type="checkbox"/> 1 | <input type="checkbox"/> 2                |
| Asthma                    | <input type="checkbox"/> 1 | <input type="checkbox"/> 2                |
| Anxiety                   | <input type="checkbox"/> 1 | <input type="checkbox"/> 2                |
| Depression                | <input type="checkbox"/> 1 | <input type="checkbox"/> 2                |
| Other Please give details | <input type="checkbox"/> 1 | <input type="checkbox"/> 2                |
| _____                     | <input type="checkbox"/> 1 | <input type="checkbox"/> 2                |

If you did have a long-term health problem, did you receive additional or specialist care during your pregnancy for this reason?

1 Yes  2 No

If you received specialist care, how well was this co-ordinated?

Please tick one box only

1 Very well  2 Quite well  3 Not very well

**Antenatal check-ups**

A 'check-up' is any contact with a midwife or a doctor to check the progress of your pregnancy. This usually includes having your blood pressure and urine checked. Please ignore other appointments that did not include these things, such as a visit **only** for a scan or a blood test.

**B8. During your pregnancy did you have any antenatal check-ups?**

Please tick one box only

1 Yes  2 No  3 Not sure / Don't know

**B9. Roughly how many antenatal check-ups did you have from each of the following?**

Please write in the number for each

- Midwife
- Family doctor (GP)
- Obstetrician (hospital doctor)
- Other Please give details \_\_\_\_\_

**B10. During your pregnancy did you have the name and contact details (e.g. phone number) of a midwife or doctor you could get in touch with?**

1 Yes  2 No  3 Not sure / Can't remember

**B11. During your pregnancy did you ever have an ultrasound scan, showing your baby on a screen?**

1 Yes  2 No

If No, please go to B16

**B12. Did you have a dating scan?** This takes place between 8 and 14 weeks of pregnancy and tells you when your baby is due.  Yes  No

**B13. Did you have a scan at around 20 weeks of pregnancy?** This may have been called a '20 week scan', an 'anomaly' scan or a 'mid-trimester' scan.  Yes  No

**B14. Roughly how many weeks pregnant were you...** at your first scan?   weeks  
at your last scan?   weeks

**B15. Roughly how many scans did you have in total during your pregnancy?**   scans

**B16. Did any of the following affect your pregnancy or your baby?** Please tick all that apply

|                                                  | Yes, I experienced this  | Yes, I saw a doctor or midwife about this |
|--------------------------------------------------|--------------------------|-------------------------------------------|
| High blood pressure or pre-eclampsia             | <input type="checkbox"/> | <input type="checkbox"/>                  |
| Bleeding                                         | <input type="checkbox"/> | <input type="checkbox"/>                  |
| Low-lying placenta                               | <input type="checkbox"/> | <input type="checkbox"/>                  |
| Other placental problem                          | <input type="checkbox"/> | <input type="checkbox"/>                  |
| Multiple pregnancy                               | <input type="checkbox"/> | <input type="checkbox"/>                  |
| Baby not growing well                            | <input type="checkbox"/> | <input type="checkbox"/>                  |
| Threatened preterm labour                        | <input type="checkbox"/> | <input type="checkbox"/>                  |
| Malformation of the baby                         | <input type="checkbox"/> | <input type="checkbox"/>                  |
| Previous caesarean (through a cut in your tummy) | <input type="checkbox"/> | <input type="checkbox"/>                  |
| Other Please give details                        | <input type="checkbox"/> | <input type="checkbox"/>                  |

**If you experienced any of the above,** did you receive additional or specialist care during your pregnancy for this reason?  Yes  No

**If you received specialist care,** how well was this co-ordinated?  
Please tick one box only  Very well  Quite well  Not very well

## Admissions to hospital during your pregnancy

**B17. While you were pregnant, before you went into labour did you stay in hospital overnight?** Not counting induction  Yes  No

If No, please go to B20

If Yes, how many times in total?   times

If Yes, how many nights in total?   nights

**B18. When was this?** Please tick all that apply

During early pregnancy (1 – 13 weeks)

During mid-pregnancy (14 – 27 weeks)

During late pregnancy (after 27 weeks)

**B19. Please tell us the reason(s) for your stay(s) in hospital during your pregnancy?**

**Your feelings and worries**

**B20. Thinking about the care you received from staff during your pregnancy, do you agree or disagree with the following statements? Please tick one box for each line**

| Midwives...                              | Agree                      | Disagree                   | Not sure                   |
|------------------------------------------|----------------------------|----------------------------|----------------------------|
| Talked to me in a way I could understand | <input type="checkbox"/> 1 | <input type="checkbox"/> 2 | <input type="checkbox"/> 3 |
| Treated me with respect                  | <input type="checkbox"/> 1 | <input type="checkbox"/> 2 | <input type="checkbox"/> 3 |
| Treated me with kindness                 | <input type="checkbox"/> 1 | <input type="checkbox"/> 2 | <input type="checkbox"/> 3 |
| Listened to my concerns                  | <input type="checkbox"/> 1 | <input type="checkbox"/> 2 | <input type="checkbox"/> 3 |
| Doctors...                               | Agree                      | Disagree                   | Not sure                   |
| Talked to me in a way I could understand | <input type="checkbox"/> 1 | <input type="checkbox"/> 2 | <input type="checkbox"/> 3 |
| Treated me with respect                  | <input type="checkbox"/> 1 | <input type="checkbox"/> 2 | <input type="checkbox"/> 3 |
| Treated me with kindness                 | <input type="checkbox"/> 1 | <input type="checkbox"/> 2 | <input type="checkbox"/> 3 |
| Listened to my concerns                  | <input type="checkbox"/> 1 | <input type="checkbox"/> 2 | <input type="checkbox"/> 3 |

**B21. During your pregnancy, before you went into labour, did you have any specific worries about labour and birth? Please tick one box for each line**

|                                         | Very worried               | Quite worried              | Not very worried           | Not at all worried         |
|-----------------------------------------|----------------------------|----------------------------|----------------------------|----------------------------|
| Not knowing when I would go into labour | <input type="checkbox"/> 1 | <input type="checkbox"/> 2 | <input type="checkbox"/> 3 | <input type="checkbox"/> 4 |
| Getting to the hospital in time         | <input type="checkbox"/> 1 | <input type="checkbox"/> 2 | <input type="checkbox"/> 3 | <input type="checkbox"/> 4 |
| Having to be induced                    | <input type="checkbox"/> 1 | <input type="checkbox"/> 2 | <input type="checkbox"/> 3 | <input type="checkbox"/> 4 |
| Having a long labour                    | <input type="checkbox"/> 1 | <input type="checkbox"/> 2 | <input type="checkbox"/> 3 | <input type="checkbox"/> 4 |
| Pain and discomfort of labour           | <input type="checkbox"/> 1 | <input type="checkbox"/> 2 | <input type="checkbox"/> 3 | <input type="checkbox"/> 4 |
| Getting effective pain relief           | <input type="checkbox"/> 1 | <input type="checkbox"/> 2 | <input type="checkbox"/> 3 | <input type="checkbox"/> 4 |
| Not knowing how long labour would take  | <input type="checkbox"/> 1 | <input type="checkbox"/> 2 | <input type="checkbox"/> 3 | <input type="checkbox"/> 4 |
| Having a forceps or ventouse delivery   | <input type="checkbox"/> 1 | <input type="checkbox"/> 2 | <input type="checkbox"/> 3 | <input type="checkbox"/> 4 |
| Embarrassment                           | <input type="checkbox"/> 1 | <input type="checkbox"/> 2 | <input type="checkbox"/> 3 | <input type="checkbox"/> 4 |
| Needing a caesarean                     | <input type="checkbox"/> 1 | <input type="checkbox"/> 2 | <input type="checkbox"/> 3 | <input type="checkbox"/> 4 |
| That I might die                        | <input type="checkbox"/> 1 | <input type="checkbox"/> 2 | <input type="checkbox"/> 3 | <input type="checkbox"/> 4 |
| That my baby might die                  | <input type="checkbox"/> 1 | <input type="checkbox"/> 2 | <input type="checkbox"/> 3 | <input type="checkbox"/> 4 |
| Other <i>Please give details</i>        | <input type="checkbox"/> 1 | <input type="checkbox"/> 2 | <input type="checkbox"/> 3 | <input type="checkbox"/> 4 |

**B22. Is there anything else you would like to say about your antenatal care?**

## Section C: The birth of your baby

**C1. Were there concerns about your baby before labour and delivery?**  Yes  No

If Yes, what were these concerns *Please tick all that apply*

- My baby was preterm
- My baby was not growing well
- My membranes ruptured early
- My baby had a clinical condition
- Other *Please give details* \_\_\_\_\_

**C2. Did you have a labour?**  Yes  No

If No and you had a caesarean section before labour had started, *please go to C10*

**C3. How did your labour start?** *Please tick all that apply*

- It started naturally
- I was given a vaginal gel or pessary to induce my labour
- I had one or more membrane sweeps
- My waters were broken by a doctor or a midwife (amniotomy)
- I was given a drip (in my hand or arm) to induce my labour

**C4. Roughly how long did your labour last?**   hours and/or   minutes

**C5. During your labour, which of the following did you use to relieve the pain?**

*Please tick all that apply*

- Natural methods (e.g. breathing, massage)
- Water or a birthing pool
- TENS machine (with pads on your back)
- Gas and air (breathing through a mask or mouth-piece)
- Injection of pethidine or a similar painkiller
- Epidural or spinal (injection in your back)
- Other *Please give details* \_\_\_\_\_

**C6. During your labour, were you monitored (checked)?** *Please tick all that apply*

- Staff listened with a stethoscope (or ear trumpet) now and then
- Sonicaid (a hand held monitor) was used now and then
- A monitor was used now and then, with a belt around my tummy
- A monitor was used constantly with a belt around my tummy
- A monitor was used constantly with a clip attached to the baby's head
- Other *Please give details* \_\_\_\_\_
- I had no monitoring
- Not sure / Can't remember

**C7. While you were in labour or before your delivery did you or your partner suspect that something was wrong?**  Yes  No

**If Yes**, what made you think there was something wrong? *Please tick all that apply*

- The baby's movement slowed or the normal pattern of movement had changed
- The baby's heart rate was abnormal
- Bleeding
- Pain
- I just didn't feel things were right
- Midwives / doctors were concerned
- Other *Please give details* \_\_\_\_\_

**C8. Were you transferred by ambulance during your labour (from home to hospital or between hospitals)?**  Yes  No

**C9. If you were transferred by ambulance...**

Roughly how far did you have to travel?    miles

Roughly how long did this take?    minutes

**C10. What kind of delivery did you have?** *Please tick one box only*

- Normal (vaginal) birth
- A caesarean (through a cut in your tummy)
- Delivery using forceps
- Delivery using vacuum cap on the baby's head (ventouse)
- Delivery using forceps and vacuum cap (ventouse)

**If you had a caesarean, please go to C12**

**C11. If you had a vaginal delivery, did you have any of the following?** *Please tick all that apply*

- An episiotomy (cut)
- A tear (not a deliberate cut)
- Stitches
- Don't know / Can't remember

**If you had a vaginal delivery, please go to C15**

**C12. If you had a caesarean this time was this...** *Please tick one box only*

- Planned and carried out before you went into labour?
- Planned, but carried out after you had gone into labour?
- The result of an unforeseen problem during your labour?

**C13. For your caesarean, what kind of anaesthetic did you have?** *Please tick one box only*

- An epidural or spinal anaesthetic
- A general anaesthetic (making you go to sleep)



**C14. Why did you have a caesarean?** *Please tick all that apply*

- 1 My baby was 'distressed'
- 1 Labour had 'failed to progress'
- 1 I wanted my baby to be born in this way
- 1 My baby wouldn't fit through my pelvis
- 1 Breech presentation (feet or bottom first)
- 1 Because I had a caesarean before
- 1 I had twins, triplets or more
- 1 Because of worries about my health
- 1 Because I was in premature labour
- 1 Other reason *Please give details:* \_\_\_\_\_
- 1 Don't know / Can't remember

**C15. Where was your baby born?** *Please tick one box only*

- 1 In hospital, in a midwife-led unit
- 2 In hospital, in a consultant-led unit
- 3 In a midwife-led unit or birth centre separate from hospital
- 4 At home
- 5 Other *Please give details* \_\_\_\_\_

## Your care

*Please answer the following section if you had a vaginal birth or a caesarean.*

**C16. Altogether, how many different midwives looked after you during your labour and birth of your baby?** *Please tick one box only*

- 1 One
- 2 Two
- 3 Three
- 4 Four
- 5 Five or more

**C17. Had you met any of these midwives before?** *Please tick one box only*

- 1 All of them
- 2 Some of them
- 3 None of them

**C18. Who delivered your baby?** *Please tick all that apply*

- 1 Midwife
- 1 Doctor (obstetrician)
- 1 Other *Please give details* \_\_\_\_\_

**C19. How well do you feel staff communicated with you about your care in labour and birth?**

*Please tick one box only*

- 1 Very well
- 2 Fairly well
- 3 Not very well
- 4 Not at all well

**C20. Did you have confidence and trust in the staff caring for you during your labour and birth?**

*Please tick one box only*

- 1 Always
- 2 Sometimes
- 3 Rarely
- 4 Never

**C21. Overall during your labour, did you feel...** *Please tick one box for each line*

|                                     | Yes                        | To some extent             | No                         |
|-------------------------------------|----------------------------|----------------------------|----------------------------|
| Listened to?                        | <input type="checkbox"/> 1 | <input type="checkbox"/> 2 | <input type="checkbox"/> 3 |
| Your concerns were taken seriously? | <input type="checkbox"/> 1 | <input type="checkbox"/> 2 | <input type="checkbox"/> 3 |
| Informed about what was happening?  | <input type="checkbox"/> 1 | <input type="checkbox"/> 2 | <input type="checkbox"/> 3 |
| You had a part in decision-making?  | <input type="checkbox"/> 1 | <input type="checkbox"/> 2 | <input type="checkbox"/> 3 |
| Confident about the decisions made? | <input type="checkbox"/> 1 | <input type="checkbox"/> 2 | <input type="checkbox"/> 3 |

**C22. Were you (and / or your husband, partner or companion) left alone by staff at a time when it worried you?** *Please tick one box only*

- 1 No, not at all
- 2 Yes, during labour
- 3 Yes, shortly after the delivery
- 4 Yes, during labour and shortly after the delivery

**C23. Thinking about the care you received from midwives and doctors during your labour and birth, do you agree or disagree with the following statements?**

*Please tick one box for each line*

| Midwives...                              | Agree                      | Disagree                   | Not sure                   |
|------------------------------------------|----------------------------|----------------------------|----------------------------|
| Talked to me in a way I could understand | <input type="checkbox"/> 1 | <input type="checkbox"/> 2 | <input type="checkbox"/> 3 |
| Treated me with respect                  | <input type="checkbox"/> 1 | <input type="checkbox"/> 2 | <input type="checkbox"/> 3 |
| Treated me with kindness                 | <input type="checkbox"/> 1 | <input type="checkbox"/> 2 | <input type="checkbox"/> 3 |
| Listened to my concerns                  | <input type="checkbox"/> 1 | <input type="checkbox"/> 2 | <input type="checkbox"/> 3 |
| Doctors...                               | Agree                      | Disagree                   | Not sure                   |
| Talked to me in a way I could understand | <input type="checkbox"/> 1 | <input type="checkbox"/> 2 | <input type="checkbox"/> 3 |
| Treated me with respect                  | <input type="checkbox"/> 1 | <input type="checkbox"/> 2 | <input type="checkbox"/> 3 |
| Treated me with kindness                 | <input type="checkbox"/> 1 | <input type="checkbox"/> 2 | <input type="checkbox"/> 3 |
| Listened to my concerns                  | <input type="checkbox"/> 1 | <input type="checkbox"/> 2 | <input type="checkbox"/> 3 |

**C24. We would like to know how you feel you were looked after during your labour and birth. Please circle any of the words below which describe the staff you saw during labour and birth.**

*Circle as many as you wish*

- |             |               |               |               |
|-------------|---------------|---------------|---------------|
| rushed      | good-humoured | insensitive   | kind          |
| considerate | unhelpful     | supportive    | offhand       |
| rude        | warm          | inconsiderate | polite        |
| sensitive   | bossy         | informative   | condescending |

Are there any other words you would like to add? \_\_\_\_\_

**C25. Is there anything else you would like to say about your care during labour and the birth of your baby?**

## Section D: If your baby needed specialist care

After birth some babies need specialist care and are admitted to a neonatal unit (NNU), sometimes called a Special Care Baby Unit (SCBU) or Neonatal Intensive Care Unit (NICU).

**D1. Was your baby cared for in a neonatal unit at all?**  Yes  No

If your baby was not cared for in a neonatal unit, please go to Section E

**D2. Why was your baby admitted to a neonatal unit? Please tick all that apply**

My baby was premature

My baby had breathing problems

My baby had feeding difficulties

For observation

Other Please give details \_\_\_\_\_

**D3. Before your baby was born had you met any of the neonatal unit staff?**  Yes  No

**D4. Was your baby transferred from one hospital to another?**  Yes  No

**D5. If your baby was transferred, why was this? Please tick all that apply**

My hospital did not have a neonatal unit

There were no cots available in my hospital

My hospital did not have the specialist facilities needed

Other Please give details \_\_\_\_\_

**D6. If your baby was transferred to another hospital, roughly how far away was this?**

miles

**D7. Was your baby transferred more than once?**  Yes  No  Does not apply

D8. How many neonatal units in total provided care for your baby?

units

D9. When did you first... Please tick one box for each line

|                  | At the birth               | First day                  | First week                 | More than a week           | Was not well enough        | Didn't want this           |
|------------------|----------------------------|----------------------------|----------------------------|----------------------------|----------------------------|----------------------------|
| See your baby?   | <input type="checkbox"/> 1 | <input type="checkbox"/> 2 | <input type="checkbox"/> 3 | <input type="checkbox"/> 4 | <input type="checkbox"/> 5 | <input type="checkbox"/> 6 |
| Touch your baby? | <input type="checkbox"/> 1 | <input type="checkbox"/> 2 | <input type="checkbox"/> 3 | <input type="checkbox"/> 4 | <input type="checkbox"/> 5 | <input type="checkbox"/> 6 |
| Hold your baby?  | <input type="checkbox"/> 1 | <input type="checkbox"/> 2 | <input type="checkbox"/> 3 | <input type="checkbox"/> 4 | <input type="checkbox"/> 5 | <input type="checkbox"/> 6 |

D10. While your baby was in neonatal care... Please tick one box for each line

|                                                         | Always                     | Sometimes                  | Rarely                     | Never                      |
|---------------------------------------------------------|----------------------------|----------------------------|----------------------------|----------------------------|
| Was the equipment explained to you?                     | <input type="checkbox"/> 1 | <input type="checkbox"/> 2 | <input type="checkbox"/> 3 | <input type="checkbox"/> 4 |
| Were the procedures explained to you?                   | <input type="checkbox"/> 1 | <input type="checkbox"/> 2 | <input type="checkbox"/> 3 | <input type="checkbox"/> 4 |
| Were your baby's problems regularly discussed with you? | <input type="checkbox"/> 1 | <input type="checkbox"/> 2 | <input type="checkbox"/> 3 | <input type="checkbox"/> 4 |
| Was your baby's treatment plan discussed with you?      | <input type="checkbox"/> 1 | <input type="checkbox"/> 2 | <input type="checkbox"/> 3 | <input type="checkbox"/> 4 |

D11. While your baby was in neonatal care did you do any of the following for him or her?

Please tick one box for each line

|                                         | Yes                        | No, my baby was not well enough | No, I was not well enough  | No                         |
|-----------------------------------------|----------------------------|---------------------------------|----------------------------|----------------------------|
| Help to clean your baby's face or hands | <input type="checkbox"/> 1 | <input type="checkbox"/> 2      | <input type="checkbox"/> 3 | <input type="checkbox"/> 4 |
| Change your baby's position             | <input type="checkbox"/> 1 | <input type="checkbox"/> 2      | <input type="checkbox"/> 3 | <input type="checkbox"/> 4 |
| Change your baby's nappy                | <input type="checkbox"/> 1 | <input type="checkbox"/> 2      | <input type="checkbox"/> 3 | <input type="checkbox"/> 4 |
| 'Top and tail' your baby                | <input type="checkbox"/> 1 | <input type="checkbox"/> 2      | <input type="checkbox"/> 3 | <input type="checkbox"/> 4 |
| Cuddle your baby                        | <input type="checkbox"/> 1 | <input type="checkbox"/> 2      | <input type="checkbox"/> 3 | <input type="checkbox"/> 4 |
| Dress your baby                         | <input type="checkbox"/> 1 | <input type="checkbox"/> 2      | <input type="checkbox"/> 3 | <input type="checkbox"/> 4 |
| Bath your baby                          | <input type="checkbox"/> 1 | <input type="checkbox"/> 2      | <input type="checkbox"/> 3 | <input type="checkbox"/> 4 |
| Feed your baby                          | <input type="checkbox"/> 1 | <input type="checkbox"/> 2      | <input type="checkbox"/> 3 | <input type="checkbox"/> 4 |

D12. When your baby was in neonatal care, did you feel...

|                                                                        | Always                     | Sometimes                  | Rarely                     | Never                      |
|------------------------------------------------------------------------|----------------------------|----------------------------|----------------------------|----------------------------|
| Supported by the staff on the unit?                                    | <input type="checkbox"/> 1 | <input type="checkbox"/> 2 | <input type="checkbox"/> 3 | <input type="checkbox"/> 4 |
| Able to see your baby when you wanted?                                 | <input type="checkbox"/> 1 | <input type="checkbox"/> 2 | <input type="checkbox"/> 3 | <input type="checkbox"/> 4 |
| You were given the information you needed about your baby's condition? | <input type="checkbox"/> 1 | <input type="checkbox"/> 2 | <input type="checkbox"/> 3 | <input type="checkbox"/> 4 |
| That staff were aware of your needs as parents?                        | <input type="checkbox"/> 1 | <input type="checkbox"/> 2 | <input type="checkbox"/> 3 | <input type="checkbox"/> 4 |
| Involved in decisions about your baby's care?                          | <input type="checkbox"/> 1 | <input type="checkbox"/> 2 | <input type="checkbox"/> 3 | <input type="checkbox"/> 4 |
| Included in your baby's care?                                          | <input type="checkbox"/> 1 | <input type="checkbox"/> 2 | <input type="checkbox"/> 3 | <input type="checkbox"/> 4 |

**D13. While your baby was in neonatal care did you have any opportunity for skin-to-skin (kangaroo) care? Please tick one box only**

<sub>1</sub> Quite a lot    <sub>2</sub> Sometimes    <sub>3</sub> Rarely    <sub>4</sub> Not at all

**D14. Were you discharged home while your baby was in neonatal care?**       <sub>1</sub> Yes    <sub>2</sub> No

**D15. During your baby's time in neonatal care did you stay overnight in the hospital?**       <sub>1</sub> Yes    <sub>2</sub> No

**If Yes, for how many nights in total?**

**D16. If you stayed overnight, where was this? Please tick all that apply**

<sub>1</sub> A parents' room in or next to the neonatal unit

<sub>1</sub> A parents' room somewhere else

<sub>1</sub> On the postnatal ward

<sub>1</sub> Somewhere your partner could also stay

<sub>1</sub> Other *Please give details* \_\_\_\_\_

**D17. For how long was your baby in neonatal care in total?**

*hours* **OR**   *days* **OR**   *weeks*

**D18. Overall, how satisfied or dissatisfied were you with the neonatal care your baby received? Please tick one box only**

<sub>1</sub> Very satisfied    <sub>2</sub> Satisfied    <sub>3</sub> Neither satisfied nor dissatisfied

<sub>4</sub> Dissatisfied    <sub>5</sub> Very dissatisfied

**D19. Is there anything else you would like to tell us about your baby's stay in neonatal care?**

## Section E: Your care in hospital after the birth

This section is about your postnatal maternity unit or hospital stay. If you gave birth to your baby at home and did not spend any time in a maternity unit (or hospital) after the birth please go to Section F.

**E1. How long did you stay in the maternity unit (or hospital) after your baby was born?**

hours or   days

**E2. Where did you stay? Please tick all that apply**

In a single room / private room

In a shared room / ward

**E3. Where was this? Please tick all that apply**

On the labour ward

On the postnatal ward

On the antenatal ward

High dependency / intensive care

Other Please give details \_\_\_\_\_

**E4. Was this... Please tick all that apply**

Away from other postnatal women and babies?

Where your partner could stay?

Where you could stay close to your baby?

Other Please give details \_\_\_\_\_

**E5. Thinking about the care you received in the maternity unit (or hospital) after the birth of your baby, do you agree or disagree with the following statements?**

Please tick one box for each line

|                                                | Agree                    | Disagree                 | Not sure                 |
|------------------------------------------------|--------------------------|--------------------------|--------------------------|
| Staff talked to me in a way I could understand | <input type="checkbox"/> | <input type="checkbox"/> | <input type="checkbox"/> |
| Staff treated me with respect                  | <input type="checkbox"/> | <input type="checkbox"/> | <input type="checkbox"/> |
| Staff treated me with kindness                 | <input type="checkbox"/> | <input type="checkbox"/> | <input type="checkbox"/> |
| Staff listened to my concerns                  | <input type="checkbox"/> | <input type="checkbox"/> | <input type="checkbox"/> |
| Staff treated me as an individual              | <input type="checkbox"/> | <input type="checkbox"/> | <input type="checkbox"/> |
| Staff gave me the care I needed                | <input type="checkbox"/> | <input type="checkbox"/> | <input type="checkbox"/> |

**E6. Looking back, do you feel that the length of your postnatal stay was...**

<sub>1</sub> Too long?  <sub>2</sub> Too short?  <sub>3</sub> About right?  <sub>4</sub> Not sure / Don't know

**E7. Is there anything else you would like to say about your postnatal care in the maternity unit (or hospital)? Please give details**

## Section F: Your care at home after the birth

**F1. When you were discharged home after the birth of your baby did you have the name and telephone number of a midwife you could contact?**

<sub>1</sub> Yes  <sub>2</sub> No  <sub>3</sub> Not sure / Don't know

**F2. Were you visited at home by a midwife? Please tick one box only**

- <sub>1</sub> Yes
- <sub>2</sub> No, I visited the midwife or saw a midwife in a clinic
- <sub>3</sub> No, I was not offered a visit
- <sub>4</sub> No, I was visiting or staying near my baby in a neonatal unit (NNU or SCBU)
- <sub>5</sub> No, I moved house
- <sub>6</sub> No, I did not want a midwife to visit
- <sub>7</sub> No, for another reason

**F3. Were you visited at home by your family doctor (GP)?**

<sub>1</sub> Yes  <sub>2</sub> No  <sub>3</sub> Not sure / Don't know

**F4. Once home, roughly how many times in the first three months did you....**

See a midwife at home?   times

See a maternity support worker at home?   times

See your family doctor (GP)?   times

See a health visitor?   times

**F5. How many different midwives in total visited you at home after your baby was born?**

*Please tick one box only*

<sub>1</sub> None  <sub>2</sub> One  <sub>3</sub> Two  <sub>4</sub> Three or more  <sub>5</sub> Don't know / Can't remember

**F6. Had you met any of these midwives before you had your baby? Please tick one box only**

<sub>1</sub> All of them  <sub>2</sub> Some of them  <sub>3</sub> None of them  <sub>4</sub> Not applicable

**F7. Did you have confidence and trust in the midwives you saw at home?**

Please tick one box only

- <sub>1</sub> Always    <sub>2</sub> Sometimes    <sub>3</sub> Rarely    <sub>4</sub> Never    <sub>5</sub> Not applicable

**F8. Roughly how long after your baby was born did you have your last visit or contact with a midwife or maternity support worker? Please tick one box only**

- <sub>1</sub> Up to 1 week    <sub>2</sub> 2–3 weeks    <sub>3</sub> 4–6 weeks    <sub>4</sub> Later than 6 weeks    <sub>5</sub> Not applicable

**F9. For postnatal care, would you have liked to have seen a midwife...? Please tick one box only**

- <sub>1</sub> More often    <sub>2</sub> Less often    <sub>3</sub> I saw them as much as I wanted

**F10. Is there anything else you would like to say about your postnatal care after your discharge home?**

**F11. Thinking overall about your care during pregnancy, labour and postnatally, how satisfied or dissatisfied were you with the care you received...**

Please tick one box for each line

|                                  | Very satisfied                        | Satisfied                             | Neither satisfied nor dissatisfied    | Dissatisfied                          | Very dissatisfied                     |
|----------------------------------|---------------------------------------|---------------------------------------|---------------------------------------|---------------------------------------|---------------------------------------|
| During your pregnancy?           | <input type="checkbox"/> <sub>1</sub> | <input type="checkbox"/> <sub>2</sub> | <input type="checkbox"/> <sub>3</sub> | <input type="checkbox"/> <sub>4</sub> | <input type="checkbox"/> <sub>5</sub> |
| During your labour and delivery? | <input type="checkbox"/> <sub>1</sub> | <input type="checkbox"/> <sub>2</sub> | <input type="checkbox"/> <sub>3</sub> | <input type="checkbox"/> <sub>4</sub> | <input type="checkbox"/> <sub>5</sub> |
| Postnatally?                     | <input type="checkbox"/> <sub>1</sub> | <input type="checkbox"/> <sub>2</sub> | <input type="checkbox"/> <sub>3</sub> | <input type="checkbox"/> <sub>4</sub> | <input type="checkbox"/> <sub>5</sub> |
| After your baby died?            | <input type="checkbox"/> <sub>1</sub> | <input type="checkbox"/> <sub>2</sub> | <input type="checkbox"/> <sub>3</sub> | <input type="checkbox"/> <sub>4</sub> | <input type="checkbox"/> <sub>5</sub> |

## Section G: Care when your baby died

This section of the survey is about what happened around the time that your baby died.

**G1. How old was your baby when he or she died?**

- minutes OR   hours OR   days OR   weeks



**G2. Where did your baby die?**

- <sub>1</sub> On the labour ward / in the operating theatre
- <sub>2</sub> In the neonatal unit
- <sub>3</sub> At home
- <sub>4</sub> Somewhere else *Please give details* \_\_\_\_\_

**G3. Were you with your baby when he or she died?**

<sub>1</sub> Yes  <sub>2</sub> No

**G4. Did your baby die as a result of life support being withdrawn?**

<sub>1</sub> Yes  <sub>2</sub> No

If Yes, did you feel involved in decision-making about withdrawal of life support?

<sub>1</sub> Yes  <sub>2</sub> Yes, to some extent  <sub>3</sub> No  <sub>4</sub> Not applicable

**G5. After your baby died, did you do the following? Please tick one box for each line**

|                                                | Yes                                   | No, I was not offered this            | No, I was not well enough             | No, I felt I could not or did not want this |
|------------------------------------------------|---------------------------------------|---------------------------------------|---------------------------------------|---------------------------------------------|
| See your baby                                  | <input type="checkbox"/> <sub>1</sub> | <input type="checkbox"/> <sub>2</sub> | <input type="checkbox"/> <sub>3</sub> | <input type="checkbox"/> <sub>4</sub>       |
| Hold your baby                                 | <input type="checkbox"/> <sub>1</sub> | <input type="checkbox"/> <sub>2</sub> | <input type="checkbox"/> <sub>3</sub> | <input type="checkbox"/> <sub>4</sub>       |
| Feel able to spend time with your baby         | <input type="checkbox"/> <sub>1</sub> | <input type="checkbox"/> <sub>2</sub> | <input type="checkbox"/> <sub>3</sub> | <input type="checkbox"/> <sub>4</sub>       |
| Have other children or relatives see your baby | <input type="checkbox"/> <sub>1</sub> | <input type="checkbox"/> <sub>2</sub> | <input type="checkbox"/> <sub>3</sub> | <input type="checkbox"/> <sub>4</sub>       |
| Have photos of your baby                       | <input type="checkbox"/> <sub>1</sub> | <input type="checkbox"/> <sub>2</sub> | <input type="checkbox"/> <sub>3</sub> | <input type="checkbox"/> <sub>4</sub>       |
| Dress your baby                                | <input type="checkbox"/> <sub>1</sub> | <input type="checkbox"/> <sub>2</sub> | <input type="checkbox"/> <sub>3</sub> | <input type="checkbox"/> <sub>4</sub>       |
| Bath your baby                                 | <input type="checkbox"/> <sub>1</sub> | <input type="checkbox"/> <sub>2</sub> | <input type="checkbox"/> <sub>3</sub> | <input type="checkbox"/> <sub>4</sub>       |
| Have a lock of your baby's hair                | <input type="checkbox"/> <sub>1</sub> | <input type="checkbox"/> <sub>2</sub> | <input type="checkbox"/> <sub>3</sub> | <input type="checkbox"/> <sub>4</sub>       |
| Have a copy of your baby's hand or footprints  | <input type="checkbox"/> <sub>1</sub> | <input type="checkbox"/> <sub>2</sub> | <input type="checkbox"/> <sub>3</sub> | <input type="checkbox"/> <sub>4</sub>       |
| Take your baby home for a time                 | <input type="checkbox"/> <sub>1</sub> | <input type="checkbox"/> <sub>2</sub> | <input type="checkbox"/> <sub>3</sub> | <input type="checkbox"/> <sub>4</sub>       |

**G6. If your baby died in hospital were you offered or given any of the following?**

*Please tick one box for each line*

|                                                           | Yes                                   | No                                    |
|-----------------------------------------------------------|---------------------------------------|---------------------------------------|
| A quiet room to be with your baby                         | <input type="checkbox"/> <sub>1</sub> | <input type="checkbox"/> <sub>2</sub> |
| A blessing or religious ceremony                          | <input type="checkbox"/> <sub>1</sub> | <input type="checkbox"/> <sub>2</sub> |
| Help with funeral arrangements                            | <input type="checkbox"/> <sub>1</sub> | <input type="checkbox"/> <sub>2</sub> |
| Information about support groups (e.g. Bliss, Sands)      | <input type="checkbox"/> <sub>1</sub> | <input type="checkbox"/> <sub>2</sub> |
| Written information for parents after the death of a baby | <input type="checkbox"/> <sub>1</sub> | <input type="checkbox"/> <sub>2</sub> |
| Information about counselling services                    | <input type="checkbox"/> <sub>1</sub> | <input type="checkbox"/> <sub>2</sub> |

**G7. Have you met with a consultant (senior doctor) to talk over your case, since your baby died?**  Yes  No

**G8. Have you been given a cause or explanation for your baby's death?** *Please tick one box only*

- Yes, a full explanation
- Yes, a partial explanation
- No, I was not given a cause or explanation

**G9. Have you been able to ask the questions you wanted?**  Yes  To some extent  No

**G10. Were you or your partner at any time asked for consent to a post mortem?**

- Yes  No  No, a post mortem was not necessary
- No, the coroner ordered a post mortem

**If No, please go to G12**

**If Yes, when were you first asked about a post mortem?** *Please tick one box only*

- As soon as my baby's death was confirmed
- Within 12 hours of my baby's death
- Within 24 hours of my baby's death
- More than a day after my baby's death

**G11. Who asked you for consent to the post mortem?** *Please tick all that apply*

- Consultant (senior doctor)
- Junior doctor
- Midwife
- Bereavement midwife
- Don't know / Not sure

**G12. Did you...** *Please tick one box for each line*

|                                                        | Yes                      | No                       | Not sure                 | Does not apply           |
|--------------------------------------------------------|--------------------------|--------------------------|--------------------------|--------------------------|
| Receive any written information about the post mortem? | <input type="checkbox"/> | <input type="checkbox"/> | <input type="checkbox"/> | <input type="checkbox"/> |
| Feel you were informed enough to make a choice?        | <input type="checkbox"/> | <input type="checkbox"/> | <input type="checkbox"/> | <input type="checkbox"/> |
| Have enough time to make up your mind?                 | <input type="checkbox"/> | <input type="checkbox"/> | <input type="checkbox"/> | <input type="checkbox"/> |

**If you did not have a post mortem, please go to G16**

**G13. What kind of post mortem was carried out?**

- A full post mortem
- A partial post mortem
- An external examination of the baby only
- An examination of the placenta

**G14. How long after the post mortem did you find out the results?**

- 1 Within 4 weeks
- 2 5 – 8 weeks
- 3 9 – 12 weeks
- 4 After 12 weeks *Please tell us when*   *weeks*

**G15. How did you find out about the post mortem results? Please tick all that apply**

- 1 In a meeting with obstetric / neonatal consultant (senior doctor)
- 1 In a meeting with bereavement midwife
- 1 In a meeting with pathologist
- 1 In an appointment with my family doctor (GP)
- 1 Other *Please give details* \_\_\_\_\_

**If you did have a post mortem, please go to G17**

**G16. If you did not have a post mortem, why was this? Please tick all that apply**

- 1 The post mortem would take too long
- 1 The information in the forms was too much to take in
- 1 Having a post mortem is against my beliefs
- 1 I didn't need to, as I knew why my baby had died
- 1 I didn't think it would give us an answer
- 1 I didn't want my baby's body examined
- 1 I wasn't offered a post mortem
- 1 Other *Please give details* \_\_\_\_\_

**G17. What was the cause or explanation of your baby's death? Please tick all that apply**

- 1 My baby had a congenital abnormality
- 1 My baby's growth was restricted
- 1 My baby was premature
- 1 There were problems with my placenta
- 1 I had a placental abruption (placenta came away before delivery)
- 1 There were umbilical cord problems
- 1 My baby died because of trauma during labour
- 1 My baby died because of lack of oxygen during labour
- 1 My baby died because of breathing problems
- 1 My baby died from an infection
- 1 My baby's life support or care was withdrawn
- 1 My baby's death was unexplained
- 1 Other *Please give details* \_\_\_\_\_

## Section H: Father and partner experience

**This section is about your husband or partner's involvement and experience at this difficult time.** *If you are without a partner at this time, please answer these questions if your ex-partner or the father of your baby was with you during pregnancy or later, otherwise please go to section J.*

### H1. Was your husband or partner present for? *Please tick all that apply*

- 1 Your pregnancy test or when your pregnancy was confirmed
- 1 One or more of your antenatal checks
- 1 One or more of your ultrasound scans
- 1 Your labour
- 1 The birth of your baby
- 1 When your baby was admitted to the neonatal unit
- 1 When concerns about your baby were discussed
- 1 When your baby died
- 1 Not present at all

### H2. In general how did your husband or partner feel staff communicated with them?

*Please tick one box for each line*

|                         | Very well                  | Quite well                 | Not very well              | Not at all                 |
|-------------------------|----------------------------|----------------------------|----------------------------|----------------------------|
| During pregnancy        | <input type="checkbox"/> 1 | <input type="checkbox"/> 2 | <input type="checkbox"/> 3 | <input type="checkbox"/> 4 |
| During labour and birth | <input type="checkbox"/> 1 | <input type="checkbox"/> 2 | <input type="checkbox"/> 3 | <input type="checkbox"/> 4 |
| After the birth         | <input type="checkbox"/> 1 | <input type="checkbox"/> 2 | <input type="checkbox"/> 3 | <input type="checkbox"/> 4 |
| When your baby was sick | <input type="checkbox"/> 1 | <input type="checkbox"/> 2 | <input type="checkbox"/> 3 | <input type="checkbox"/> 4 |
| When your baby died     | <input type="checkbox"/> 1 | <input type="checkbox"/> 2 | <input type="checkbox"/> 3 | <input type="checkbox"/> 4 |

### H3. In general did your husband or partner feel... *Please tick one box for each line*

|                                      | Yes                        | To some extent             | No                         |
|--------------------------------------|----------------------------|----------------------------|----------------------------|
| Listened to?                         | <input type="checkbox"/> 1 | <input type="checkbox"/> 2 | <input type="checkbox"/> 3 |
| Their concerns were taken seriously? | <input type="checkbox"/> 1 | <input type="checkbox"/> 2 | <input type="checkbox"/> 3 |
| Informed about what was happening?   | <input type="checkbox"/> 1 | <input type="checkbox"/> 2 | <input type="checkbox"/> 3 |
| They had a part in decision-making?  | <input type="checkbox"/> 1 | <input type="checkbox"/> 2 | <input type="checkbox"/> 3 |
| Confident about the decisions made?  | <input type="checkbox"/> 1 | <input type="checkbox"/> 2 | <input type="checkbox"/> 3 |
| Their needs were acknowledged?       | <input type="checkbox"/> 1 | <input type="checkbox"/> 2 | <input type="checkbox"/> 3 |

### H4. Before your baby died was your husband or partner able to... *Please tick one box for each line*

|                 | Yes                        | No, they were not offered this | No, they felt they could not or did not want this |
|-----------------|----------------------------|--------------------------------|---------------------------------------------------|
| See your baby?  | <input type="checkbox"/> 1 | <input type="checkbox"/> 2     | <input type="checkbox"/> 3                        |
| Hold your baby? | <input type="checkbox"/> 1 | <input type="checkbox"/> 2     | <input type="checkbox"/> 3                        |

H5. After your baby died was your husband or partner able to... Please tick one box for each line

|                 | Yes                        | No, they were not offered this | No, they felt they could not or did not want this |
|-----------------|----------------------------|--------------------------------|---------------------------------------------------|
| See your baby?  | <input type="checkbox"/> 1 | <input type="checkbox"/> 2     | <input type="checkbox"/> 3                        |
| Hold your baby? | <input type="checkbox"/> 1 | <input type="checkbox"/> 2     | <input type="checkbox"/> 3                        |

H6. Was your husband or partner able to take paternity leave when your baby was born?

1 Yes  2 No  3 Does not apply

If Yes, how long was this for?   days OR   weeks

H7. Was your husband or partner able to take paternity or compassionate leave after your baby died?

1 Yes  2 No  3 Does not apply

If Yes, how long was this for?   days OR   weeks

## Section J: You and your partner's health and wellbeing

J1. Did you have a postnatal check-up of your own health with your GP (family doctor) between 4 and 8 weeks after the birth?

Yes  1 No  2

If you did not have a postnatal check-up, why was this? Please tick one box only

1 It was not offered

2 I did not want to have this check-up

3 Other reasons Please give details \_\_\_\_\_

J2. Did you experience any of the following 10 days after the birth of your baby, 3 months after the birth and in the last few days? Please tick all that apply

|                                                            | 10 days after the birth    | 3 months after the birth   | In the last few days       |
|------------------------------------------------------------|----------------------------|----------------------------|----------------------------|
| Poor physical health                                       | <input type="checkbox"/> 1 | <input type="checkbox"/> 2 | <input type="checkbox"/> 3 |
| Painful stitches                                           | <input type="checkbox"/> 1 | <input type="checkbox"/> 2 | <input type="checkbox"/> 3 |
| Breast soreness                                            | <input type="checkbox"/> 1 | <input type="checkbox"/> 2 | <input type="checkbox"/> 3 |
| Headaches                                                  | <input type="checkbox"/> 1 | <input type="checkbox"/> 2 | <input type="checkbox"/> 3 |
| Crying                                                     | <input type="checkbox"/> 1 | <input type="checkbox"/> 2 | <input type="checkbox"/> 3 |
| Palpitations or feelings of panic                          | <input type="checkbox"/> 1 | <input type="checkbox"/> 2 | <input type="checkbox"/> 3 |
| Depression                                                 | <input type="checkbox"/> 1 | <input type="checkbox"/> 2 | <input type="checkbox"/> 3 |
| Wound infection                                            | <input type="checkbox"/> 1 | <input type="checkbox"/> 2 | <input type="checkbox"/> 3 |
| Leaking urine when you don't mean to (stress incontinence) | <input type="checkbox"/> 1 | <input type="checkbox"/> 2 | <input type="checkbox"/> 3 |
| Difficulties with eating                                   | <input type="checkbox"/> 1 | <input type="checkbox"/> 2 | <input type="checkbox"/> 3 |
| Fatigue or severe tiredness                                | <input type="checkbox"/> 1 | <input type="checkbox"/> 2 | <input type="checkbox"/> 3 |

Please continue with this question on the next page

| J2. Did <b>you</b> experience any of the following...  | 10 days after the birth    | 3 months after the birth   | In the last few days       |
|--------------------------------------------------------|----------------------------|----------------------------|----------------------------|
| Backache                                               | <input type="checkbox"/> 1 | <input type="checkbox"/> 2 | <input type="checkbox"/> 3 |
| Anxiety                                                | <input type="checkbox"/> 1 | <input type="checkbox"/> 2 | <input type="checkbox"/> 3 |
| Difficulties or pain during sexual intercourse         | <input type="checkbox"/> 1 | <input type="checkbox"/> 2 | <input type="checkbox"/> 3 |
| Sleep problems                                         | <input type="checkbox"/> 1 | <input type="checkbox"/> 2 | <input type="checkbox"/> 3 |
| 'Flash-backs' to labour, birth or neonatal unit        | <input type="checkbox"/> 1 | <input type="checkbox"/> 2 | <input type="checkbox"/> 3 |
| Difficulties in concentrating                          | <input type="checkbox"/> 1 | <input type="checkbox"/> 2 | <input type="checkbox"/> 3 |
| Not able to go out or leave your home                  | <input type="checkbox"/> 1 | <input type="checkbox"/> 2 | <input type="checkbox"/> 3 |
| Difficulties going back to work or at work             | <input type="checkbox"/> 1 | <input type="checkbox"/> 2 | <input type="checkbox"/> 3 |
| Relationship difficulties with your husband or partner | <input type="checkbox"/> 1 | <input type="checkbox"/> 2 | <input type="checkbox"/> 3 |
| Relationship difficulties with family members          | <input type="checkbox"/> 1 | <input type="checkbox"/> 2 | <input type="checkbox"/> 3 |
| Other <i>Please give details</i><br>_____              | <input type="checkbox"/> 1 | <input type="checkbox"/> 2 | <input type="checkbox"/> 3 |

J3. Did **your partner** experience any of the following 10 days after the birth of your baby, 3 months after the birth and in the last few days? *Please tick all that apply*

|                                                    | 10 days after the birth    | 3 months after the birth   | In the last few days       |
|----------------------------------------------------|----------------------------|----------------------------|----------------------------|
| Poor physical health                               | <input type="checkbox"/> 1 | <input type="checkbox"/> 2 | <input type="checkbox"/> 3 |
| Headaches                                          | <input type="checkbox"/> 1 | <input type="checkbox"/> 2 | <input type="checkbox"/> 3 |
| Crying                                             | <input type="checkbox"/> 1 | <input type="checkbox"/> 2 | <input type="checkbox"/> 3 |
| Palpitations or feelings of panic                  | <input type="checkbox"/> 1 | <input type="checkbox"/> 2 | <input type="checkbox"/> 3 |
| Depression                                         | <input type="checkbox"/> 1 | <input type="checkbox"/> 2 | <input type="checkbox"/> 3 |
| Difficulties with eating                           | <input type="checkbox"/> 1 | <input type="checkbox"/> 2 | <input type="checkbox"/> 3 |
| Fatigue or severe tiredness                        | <input type="checkbox"/> 1 | <input type="checkbox"/> 2 | <input type="checkbox"/> 3 |
| Anxiety                                            | <input type="checkbox"/> 1 | <input type="checkbox"/> 2 | <input type="checkbox"/> 3 |
| Difficulties during sexual intercourse             | <input type="checkbox"/> 1 | <input type="checkbox"/> 2 | <input type="checkbox"/> 3 |
| Sleep problems                                     | <input type="checkbox"/> 1 | <input type="checkbox"/> 2 | <input type="checkbox"/> 3 |
| 'Flash-backs' to labour, birth or neonatal unit    | <input type="checkbox"/> 1 | <input type="checkbox"/> 2 | <input type="checkbox"/> 3 |
| Difficulties in concentrating                      | <input type="checkbox"/> 1 | <input type="checkbox"/> 2 | <input type="checkbox"/> 3 |
| Not able to go out or leave your home              | <input type="checkbox"/> 1 | <input type="checkbox"/> 2 | <input type="checkbox"/> 3 |
| Difficulties going back to work or at work         | <input type="checkbox"/> 1 | <input type="checkbox"/> 2 | <input type="checkbox"/> 3 |
| Relationship difficulties with you (their partner) | <input type="checkbox"/> 1 | <input type="checkbox"/> 2 | <input type="checkbox"/> 3 |
| Relationship difficulties with family members      | <input type="checkbox"/> 1 | <input type="checkbox"/> 2 | <input type="checkbox"/> 3 |
| Other <i>Please give details</i><br>_____          | <input type="checkbox"/> 1 | <input type="checkbox"/> 2 | <input type="checkbox"/> 3 |

- J4. Since your baby died, have you or your partner talked to health professionals or others about what happened and how you feel?**  Yes  No

If Yes, who have you and your partner talked to? Please tick all that apply

|                                                   | You                      | Your partner             |
|---------------------------------------------------|--------------------------|--------------------------|
| Midwife who was present during labour or birth    | <input type="checkbox"/> | <input type="checkbox"/> |
| Doctor who was present during labour or birth     | <input type="checkbox"/> | <input type="checkbox"/> |
| Another doctor not present during labour or birth | <input type="checkbox"/> | <input type="checkbox"/> |
| Nurse from the neonatal unit                      | <input type="checkbox"/> | <input type="checkbox"/> |
| Doctor from the neonatal unit                     | <input type="checkbox"/> | <input type="checkbox"/> |
| Family care nurse                                 | <input type="checkbox"/> | <input type="checkbox"/> |
| Bereavement midwife or nurse                      | <input type="checkbox"/> | <input type="checkbox"/> |
| Family doctor (GP)                                | <input type="checkbox"/> | <input type="checkbox"/> |
| Health visitor                                    | <input type="checkbox"/> | <input type="checkbox"/> |
| Counsellor                                        | <input type="checkbox"/> | <input type="checkbox"/> |
| Religious advisor                                 | <input type="checkbox"/> | <input type="checkbox"/> |
| Close family and friends                          | <input type="checkbox"/> | <input type="checkbox"/> |
| Work colleagues                                   | <input type="checkbox"/> | <input type="checkbox"/> |
| Other <i>Please give details</i>                  | <input type="checkbox"/> | <input type="checkbox"/> |
| _____                                             |                          |                          |
| Don't know                                        | <input type="checkbox"/> | <input type="checkbox"/> |
| Not applicable                                    | <input type="checkbox"/> | <input type="checkbox"/> |

- J5. Who or what has been the most helpful source of support...**

For you? Please give details \_\_\_\_\_

For your partner? Please give details \_\_\_\_\_

## Section K: Previous and future pregnancies

- K1. Do you have plans for future pregnancies? Please tick one box only**

- I am pregnant now   weeks
- I plan to become pregnant in the next few months
- I plan to become pregnant, but I'm not sure when
- I am not sure about becoming pregnant again
- I have decided not to have another baby

- K2. Before the pregnancy when your baby died, had you ever been pregnant before?**  Yes  No

If you have not had any previous pregnancies, please go to Section L

**K3. Had you given birth before the pregnancy when your baby died?**  Yes  No  
If Yes, how many babies had you given birth to **before** this pregnancy?   babies

**K4. Before your most recent birth had you ever given birth by caesarean section?**  Yes  No

**K5. Have you experienced the loss of a pregnancy or the death of a baby before?**  
Please tick all that apply

- No
- Yes – a miscarriage (before 13 weeks)
- Yes – a late miscarriage (13 – 24 weeks)
- Yes – a termination after 13 weeks
- Yes – a stillbirth
- Yes – a neonatal death

**K6. Before your most recent birth, did you have any long-term health problems which made previous pregnancies difficult or complicated (e.g. diabetes)?**  Yes  No  
Please give details:

**K7. Before your most recent birth, did you have problems with other pregnancies (e.g. premature birth, low-lying placenta)?**  Yes  No  
Please give details:

## Section L: You and your household

Please answer as many of these questions as you can. This will help us to describe the women taking part in this survey and show whether the care offered to women is the same regardless of their background or circumstances.

**L1. How old are you now?**   years

- L2. How old were you when you left full-time education?**
- 16 years or less
  - 17 or 18 years
  - 19 years or over
  - Still in full-time education



**L3. Which of the following people live with you?** *Please tick all that apply*

- <sub>1</sub> Other children
- <sub>1</sub> Husband or male partner
- <sub>1</sub> Same sex partner
- <sub>1</sub> Other family members
- <sub>1</sub> Other people in your household

**L4. To which of these ethnic groups would you say you belong?** *Please tick one box only*

**WHITE**

- <sub>1</sub> British
- <sub>2</sub> Irish
- <sub>3</sub> Any other White background

*If other, please write in box:*

**BLACK OR BLACK BRITISH**

- <sub>12</sub> Caribbean
- <sub>13</sub> African
- <sub>14</sub> Any other Black background

*If other, please write in box:*

**MIXED**

- <sub>4</sub> White & Black Caribbean
- <sub>5</sub> White & Black African
- <sub>6</sub> White & Asian
- <sub>7</sub> Any other Mixed background

*If other, please write in box:*

**CHINESE OR OTHER ETHNIC GROUP**

- <sub>15</sub> Chinese
- <sub>16</sub> Any other ethnic group

*If other, please write in box:*

**ASIAN OR ASIAN BRITISH**

- <sub>8</sub> Indian
- <sub>9</sub> Pakistani
- <sub>10</sub> Bangladeshi
- <sub>11</sub> Any other Asian background

*If other, please write in box:*

**L5. In which country were you born?** \_\_\_\_\_

If you were born outside the United Kingdom, what year did you come to the UK?

**L6. Do you need any help in understanding English?**  <sub>1</sub> Yes  <sub>2</sub> No

**L7. Do you have a longstanding physical problem or disability?**  <sub>1</sub> Yes  <sub>2</sub> No

**L8. Do you have a longstanding mental health problem or learning disability?**  <sub>1</sub> Yes  <sub>2</sub> No

**L9. Would you mind telling us what your health problem or disability is?**

Please give details here: \_\_\_\_\_

**L10. Do any of these problems or disabilities affect your day to day activities?**

- <sub>1</sub> Yes, definitely    <sub>2</sub> Yes, to some extent    <sub>3</sub> No    <sub>4</sub> Not applicable

**L11. Could you tell us who filled in this questionnaire? Please tick all that apply**

- <sub>1</sub> You
- <sub>1</sub> Your husband / partner
- <sub>1</sub> Other *Please give details* \_\_\_\_\_

**If there is anything else you would like to tell us about your care while you were pregnant or since your baby died, please add your comments here:**

**Was there anything else you meant to go back and complete later?**

**Please check you haven't accidentally missed any pages.**

**If the survey has raised issues or questions of concern you may wish to contact your family doctor (GP), health visitor, the Bliss helpline (0500 618 140), the Sands helpline (020 7436 5881)**

**Thank you very much for your help**

**Please return the questionnaire in the envelope provided. If you have any queries about the questionnaire or you would like to know more about the research please contact:**

Maggie Redshaw or Rachel Rowe  
National Perinatal Epidemiology Unit  
University of Oxford  
Old Road Campus  
Headington  
Oxford  
OX3 7LF  
Tel. 0808 252 4566

REC REF: 12/SC/0322 Q\_N v3.3 101012

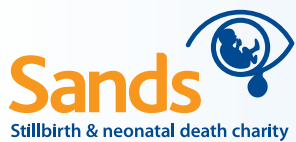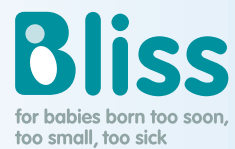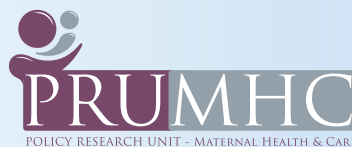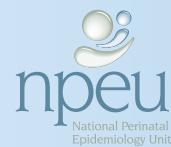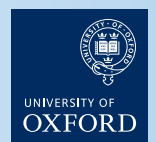

Supplement: pone.0208134.s001.pdf [file pone.0208134.s001.pdf]
